# Supplementary material
Source: publisher site journal article supplement (https://www.dovepress.com/article/392925)
Supplement: Supplementary file 1 [file get_supplementary_file.php]

Supplementary Table 1. Overview of noninvasive skin measurement techniques for the study of sensitive skin

| **Study design** | **Participants** | **Age** (yrs)  u±SD or range | **Ethnicity** | **Questionare** | **Chemical probe** | **Testing site** | **Parameter** | **Outcome** | **Conclusion** |
| --- | --- | --- | --- | --- | --- | --- | --- | --- | --- |
| **Raj, N., 2016. [33] STROBE B** | | | | | | | | | |
| Cross–sectional | TN=48.  G1: n=25 capsaicin positive;  G2: n=23 capsaicin negative.  100% Female. | 39.9±6.9 | France | None | CAT:1.10×10-4%, 3.16×10-4%, 1.10×10-3% and 3.16×10-3% , nasolabial folds with cotton buds (10 times) | Cheeks | SCH: Corneometer CM825 ;  TEWL: Aquaflux AF200. | No difference in SCH and TEWL. | The reduced maturation of corneocytes and thinner SC likely contributes to a greater penetration of capsaicin and the associated increased skin sensitivity |
| **Chen, S Y.,2018. [53] STROBE B** | | | | | | | | | |
| Cross–sectional | TN=60.  G1:n=22,LAST score ≤1 points;  G2:n=19,1 <LAST score ≤4 points;  G3:n=19,LAST score >4 points;  G4:DMSO score≤1 points;  G5:1 <LAST score ≤3;  G6:DMSO score ≥4;  G7:n=35,SLS score ≥2;  G8:n=35,SLS score <2. 100% Female. | 20-40  (31.46 ± 4.80) | Chinese | √ | LAST:50 uL, 8%,nasolabial fold, score at 30 s, 2.5/5/8 min;  DMST:30 uL,98%,forearm, score at 10 min;  SLS: 50 uL,0.5%,back, score at 24h. | Forearm | a* value and L* value: Chromameter CR400;  blood flow: Full- field Laser Perfusion Imager (moorFLPI);  depth and density of epidermis:Ultrascan UC22(before the test and after the DMSO removal) | 1.DMSO score up, CBF and a* values up, L* value down; LAST score up, CBF and a* values up, L* value down;  2.After DMSO,60 min, BF/a* value in G3 up, L* value in G2/G3 down;  3.In G7, G5 for 42.86%, in G8, G4 for 52% | No correlation between the SS and the sum LAST score /DMSO score |
| **Wang, X Y.,2020.[69] STROBE C** | | | | | | | | | |
| Cross–sectional | TN=275.  G1:n=201 rosacea;  G2:n=74,sensitive skin(LAST positive).  100%Female. | NR | Chinese | √ | NR | Face | VISIA | Erythema: SS patients was 95.9% | Peace sign and earlobe patterns of facial erythema distribution detected using RBX technology together with clinical history are good predictors for distinguishing rosacea from SS |
| **Fan, L.2018.[31] STROBE B** | | | | | | | | | |
| Case–control | TN=66.  Questionare,  G1:n=28,SS;  C:n=38,NSS.  100%Female. | 18-25 | Chinese | √ | None | Forehead, chin, and left and right cheekbones and cheeks | Sebum content:Sebumeter SM 815;  TEWL:Tewameter TM 300;  SCH:Corneometer CM 825;  pH:Skin-pH-meter pH 905;  EI/MI:Mexometer MX 18;  R2/R5/R7: Cutometer dual MPA 580; | 1.On cheekbone,sebum content in G1 lower;  2.Compared with mean values, in G1, sebum content, EI/MI and TEWL lower，but SCH higher; pH, R2/R5/R7 no difference | 1.Questionare:cheeks (72.52%), cheekbones (19.85%), and forehead (3.82%);  2.Analysis of lipid functions suggested that the main reason for SS development in women might be a barrier dysfunction caused by excessive apoptosis and lack of water. |
| **Qiao, Z.,2021.[27] STROBE B** | | | | | | | | | |
| Case–control | TN=60.  Huaxi SSQ and LAST scores,  G1:n=30, Huaxi SSQ score = 18–32, score ≥ 3;  C:n=30, Huaxi SSQ score = 12–17, LAST score = 0;  G2:LAST positive;  G3:LAST negative.  100%Female. | 20-40（28.67±11.33） | Chinese | √ | LAST:5%, score at 30 s,2.5/5 min, sum of 2.5 min and 5 min LAST scores ≥3, LAST positive | Face | TEWL/SCH:Cutometer® dual MPA 580 | In G1, SCH lower(P < 0.05),TEWL higher;  In G2,SCH down ,TEWL no difference | SS is accompanied by a decrease in species diversity and richness, which may be relevant to the weakening of the microbial barrier (due to the increase of Neisseria or the decrease of Neisseriaceae). |
| **Seidenari, S.1998. [22] STROBE C** | | | | | | | | | |
| Case–control | TN=52.  Questionare,  G1:n=26, SS;  C:n=26, NSS.  100%Female. | 25-45（35.6±1.1） | Caucasian | √ | LAST:10%,nasolabial groove,after 30 s、2 min、5 min | Left volar forearm (Only TEWL values were measured at the left forearm), cheek | TEWL:Evaporimeter EP1; SCH:Corneometer CM 820; L*/a*/b* value : Chromameter CR200; sebum content:Sebumeter SM810 ;pH:pH 90 | 1.TEWL on the forearm were the same in G1 and C;2.In G1: increase in TEWL, pH and a* values(p<0.05) ; decrease in SCH(p<0.05), sebum content and L* values on the face. | Alterations of baseline capacitance values indicate the tendency to barrier impairment and support the view that skin hyperreactivity to water-soluble irritants is induced by a greater amount of irritants absorbed, whereas the increase in the erythema parameter shows that cutaneous vascular hyperreactivity in subjects with sensitive skin also corresponds to baseline vasodilation |
| **Jiang, W C.,2020.[67] STROBE B** | | | | | | | | | |
| Case–control | TN=137.  1.questionare,  G1:n=39,SS;NSS:  G2:n=39.  2.LASTN-CATN,  G3:n=32,LASTN-CATP;  G4:n=32,LASTP-CATN;  G5:n=34,LASTP-CATP.  54.74% Female | 18-60 | Chinese | √10 questions | 1.LAST:50ul,10%,nasolabial fold, score at 30 s,2.5/5 min;  2.CAT:50 ul,1.0×10-5%,nasolabial fold, score at 30 s,2.5/5 min | Right cheek | D-OCT | Compared with LASTN, the vascular vessels were closer to epidermis in LASTP. High blood vessel density, mesh and branching vessels were more popular in SS than normal skin. The vascular depth had a closely negative correlation with face flushing and sum scores of sting, and vascular shapes had a good positive correlation with face flushing and the sum scores of burning | This study indicates that there is a significant difference in vascular depth, shape, and density between SS and normal skin which is valuable to explore SS pathologic mechanism and to further investigate cutaneous microvasculature functions in SS. |
| **Falcone, D.,2017.[34] STROBE B** | | | | | | | | | |
| Case–control | TN=18.  Questionare,  G1:n=9,SS;  C:n=9,NSS.  83.33%Female | G1: 19–36; C:20–32 | Netherlands | √ | Histamine iontophoresis:1.5 mL,0.5%, buttock (5/30/60 min) and forearm (2.5 min) | Buttock and forearm | TEWL:Aquaflux AF200;  a * value:Spectrophotometer 2600d;  wheal-and-flare reaction:single-lens reflex digital camera D3200(Matlab analyze) | In G1 and C, TEWL , a * value no difference;in G1 and C,TEWL increased by approximately 3.5 g/m 2 /h at 5 min and started to recover at 30 min, yet at 60 min it remained slightly but significantly higher than baseline ( p ≤ 0.05). | Histamine iontophoresis is a well-standardized in vivo model to quantitatively study the early stages of cutaneous inflammation with minimal impact on the skin barrier. In line with previous studies, it highlighted increased sensory perceptions in SS. |
| **Richters, R J.,2017.[32] STROBE B** | | | | | | | | | |
| Cross–sectional | TN=97.  Questionare,  G1:n=29,SS;  C:n=30,NSS;  57.63% Female | G1:18-28(21.5);  C:18-32(21) | Netherlands | √ | None | forearm; arm; right cheek | CRM (gen2SCA performance model of RiverD International B.V.);  SCH:Corneometer CM825;  TEWL:AF200;  Sebum content:sebumeter SM815 | 1.CRM:no difference on G1 and C, on cheek, G1 lower average ceramides at 4–8 μm, yet these values were again higher than AD (p = 0.097); In the cheek, SCH correlated only with the NMF (p = 0.029).2.Biophysical Measurements:In forearm and thenar,G1 TEWL lower;In cheek,G1 and C in SCH/TEWL/sebum content no difference | The skin barrier in SS is not impaired in terms of SC thickness, water, NMF, and ceramides/fatty acid content. The failure of biophysical techniques to follow alterations in the molecular composition of the skin barrier revealed by CRM emphasizes a strong need in sensitive and specific tools for in vivo skin barrier analysis. |
| **Zheng, Y.,2020.[23] STROBE C** | | | | | | | | | |
| Cross–sectional | TN=77.  G1:n=22,LAST value≥3;  G2:n = 24, 0 <LAST score < 3;  C:n=23,0<LAST score <3.  100% Female | 18-25 | Chinese | None | NR | Face; cheek | Red spots range:VISIA;  Sebum content:Sebumeter SM 815;  TEWL:Tewameter TM 300;  SCH:Corneometer CM 825;  pH:Skin-pH-meter pH 905;  EI/MI:Mexometer MX 18;  R2/R5/R7: Cutometer dual MPA 580;  skin temperature | TEWL: G1 higher; more red spots range in G1(p = 0.16);  SCH: G1 and G2 higher than C | S. epidermidis was observed to decrease significantly in SS group, indicating a correlation between skin microbiome and female LAST-SS |
| **Issachar, N.,1998.[56] STROBE B** | | | | | | | | | |
| Case–control | TN=20.  G1:n=10,LASTP SS;  C:n=10,LASTN NSS.  100% Female | 18-31 | NR | None | LAST:50 ul,10%, nasolabial fold, score at 3/5 min.  NT:50 ul,0.5%,forearm,after 5/10/20/30/40/50 and 60 min check blood flow | Forearm | Blood flow:the laser Doppler perfusion imager (PIM 1.0 Lisca Devolopment ) or LDPI | In G1: LDPI values higher than in C during the first 30 min; blood flow values were higher than C during 40 min | Correlation between increased penetration of methyl nicotinate and skin response to lactic acid may suggest increased penetration of water-soluble chemicals in individuals with sensitive skin |
| **Li, S.,2015.[24] STROBE B** | | | | | | | | | |
| Cross–sectional | TN=138.  1.Clinical diagnosis,  G0:total score=0; G1:total score =1;G2:total score =2;G3:total score≥ 3. 2.LAST，  GA: no stinging；  GB: stinging between 2.5 min and 5 min；  GC: stinging between 30 s and 2.5 min；  GD: stinging before 30 s.  3.LAST，  GI:n=40, no stinging;  GII:n=13, clinical score rise at 30 s, 2.5 min, 5 min;  GIII:n=22, uptrend then a plateau of clinical scores at 30 s, 2.5 min, 5 min;  GIV:n=20, initial plateau and then uptrend;  GV:n=9, initial plateau and then a downtrend;  GVI:n=25, initial uptrend and then a downtrend;  GVII:n=5,maintained. 100% Female | 18-55(39±10) | Chinese | clinical diagnosis | LAST:50 ul,10%,nasolabial fold and cheek ,30 s, 2.5 min and 5 min | Nasolabial fold | TEWL:Tewameter TM210;  CPT:Neurometer CPT/C | 1.CS: Negative correlation between CSs and CPT at 5 and 250 Hz; TEWL was lower (p<0.05) for G0 than G1 and G3.  2.CPT at 5 Hz and 250 Hz in turn decreased from GA to GD; TEWL value were significantly lower for GA than GB, GC and GD.TEWL and CPT among GI-GVII, CPT:GI was significantly higher than GII,GIII,GV,GVI, and GIV was significantly higher than GII. TEWL was significantly higher for GI than others | There was a positive correlation between CPTbefore and the sum of clinical scores (CSs). While the beginning time of stinging (BT) was shortened, the CPTbefore decreased and TEWL increased |
| **Issachar, N.,1997.[51] STROBE C** | | | | | | | | | |
| Case–control | TN=30.  LAST,  G1:n=15,SS(female);C:n=15,NSS(13 female,2 male).  93.33%Female | 21-35 | NR | None | LAST:50 ul,10%,nasolabial fold ,during 3/5/10 min(grouping method).when test,forearm,every 10 min for 1st h and every 1 h for 7 h(only G1);nasolabial fold,each min for 25 min | Nasolabial fold and forearm | pH:PH 900 | On forearm, G1 and C no difference;on nasolabial fold,G1 and C both decreased then increased in 25 min,G1 rise fast and higher | After LAST, measuring pH could predict cases of adverse reactions related to cosmetics |
| **Cho, H J.,2012.[35] STROBE B** | | | | | | | | | |
| Case–control | TN=50.  Questionare:G1:n=20,SS(14 female,6 male,average age 29.5);  C:n=30,NSS(12 female,18 male,average age 30.5).  52% Female | 20-40 | NR | √ | LAST:50 ul,10%,left cheek (malar eminence) ,every 1 min, till 10 min | Right cheek, arm, thigh, leg, back and palm | TEWL:Tewameter TM 210;  EI:Dermaspectrometer Cortex Technology | G1 and C, TEWL/EI values no diference at different body site | Aboutceramides, on 6 testing site,G1 ↓，on the face, the SS group showed a statistically significant decrease in the mean value of the amounts of ceramides compared to the non-SS, indicating that the amount of ceramides in the stratum corneum on the facial skin has a correlation with cases of SS on subjective judgment |
| **Kim, S J.,2008.[36] STROBE B** | | | | | | | | | |
| Cross–sectional | TN=8.  LAST:G1:n=4,SS;  C:n=4,NSS.  0% Female. | G1:23.8±1.5;C:23.3±1.9 | South Korea | None | LAST;  CAT:0.075% capsaicin cream,zygomatic,after 60 min test CPT | forearm | SCH:MPA9;TEWL:CM-2500d;  skin color(a* value) and microvascular circulation(CPT):DRT4 Moor Instrument;blood flow:Laser Doppler flowmeter | 1.CAPbefore, SCH/TEWL/a* value/blood flow no difference.CPT no differences between the two groups at 250 Hz and 2 kHz, but low level of CPT at 5 Hz,especially in G1.  2.CAPafter, In G1, with 250/5 HZ,higher than CAPbefore,but 2 k HZ lower;In C,2 k/250/5 HZ no difference | The skin sensitiveprone individuals showed a tendency towards a decreased sensory perception threshold compared with the non-skin sensitive individuals.With 0.075% capsaicin application, the perception threshold of the skin sensitive-prone subjects did not return to its baseline level after a certain period. |
| **Ahn, H J.,2021.[37] STROBE C** | | | | | | | | | |
| Case–control | TN=36.  1.LAST,  G1:n = 18,(12 female,6 male),stinger;  C1:n=18,(9 female,9 male),no-stinger;  2.Questionare,G2:n=26(16 female,10 male),SS;  C2:n=10(5 female,5 male),NSS.  58.33% Female. | 20-58(41.25) | NR | √18 questions,≥30 points,SS | LAST:5%,50 ml,nasolabial fold,score at 0/2.5/5/8 min.Zinc apply:2 mL(1 mg/cm2) zinc (zinc sulfate hydrate 4.4 mg/mL; 179.47 g/mol), face and forearm,after 60 min | forearm and face | TEWL:Tewameter TM 300;  RCM:VivaScope1500. | 1.LAST:(1) TEWL:no difference.(2) RCM：at depths of 80–104 µm on the facial skin,G1 ↑;At a depth of 24 µm, irregular honeycomb pattern in G1.  2.questionare: zinc reflectance on the face↑in G2 at depths from 8 to 16 µm, on the forearm, zinc reflectance ↑in G2 at depths of 8 to 16 µm | RCM demonstrates that in SS, there is a deeper and higher reflectance of zinc at multiple depths. Structural differences were also visualized. We conclude that RCM is a useful tool for evaluating integrity of the skin barrier |
| **Ding, D M.,2019.[25] STROBE B** | | | | | | | | | |
| Cross–sectional | TN=292.  1.LAST,  G1: n=213, LASTP;  C: n=79, LASTN.  100% Female | 18-65(31.52) | Chinese | √ Sensitive Scale(ten-point system) | LAST:50 ul,10%, nasolabial fold,2.5/5 min,≥ 3 LASTP | right cheek | TEWL:Tewameter TM 300;  SCH:Corneometer CM 825;  Sebum content:Sebumeter SM 815;  EI:memetreter 18;  pH:Skin-pH-meter: pH 905 | 1.LAST scores negatively correlated with SCH, and positively with TEWL,no correlate with either sebum content or PH or erythema index.  2.the Sensitive Scale scores of stinging, itching, tautness, scaling differed significantly between G1 and C (P < 0.05), burning and erythema were no differences between G1 and C, LAST scores positively correlated with the Sensitive Scale scores of stinging, itching, tautness and scaling (P < 0.05). | Lactic acid sting test scores positively correlated with TEWL rates. LAST scores could be used to identify subjects with sensitive skin characterized mainly by stinging and itching, but not those mainly by burning and erythema |
| **Bai, Y.,2021.[38] STROBE C** | | | | | | | | | |
| Case–control | TN=34.  G1:n=24(42.21±9.86),LASTP+questionare SS;  C:n=10(46.3±12.18),LASTN+questionare NSS.  100% Female | 18-60 | Chinese | √ | NR | Face | SCH:Corneometer CM825;  TEWL:AquaFluxAF200;  Sebum content:SM810;  facial skin surface morphology :VC98 skin scanner | SCH/TEWL/sebum content no difference | We detected that the bacteria that showed significant differences in the relative frequency between the sensitive skin and non- sensitive skin were all rare bacteria, and most of these rare bacteria were found to colonize in sensitive skin |
| **Roussaki-Schulze, A V.,2005.[45] STROBE B** | | | | | | | | | |
| Case–control | TN=62.  clinical diagnosis,  G1:n=32(19 female,13 male,average age 32.6),SS;  C:n=30(17 female,13 male,average age 30.4),NSS.  100% Female | 20-45 | Caucasian | clinical diagnosis | 1.LAST:nasolabial folds,5 min.  2.patch test:acetyl-b-methylcholine chloridem,back,48 h,72 h,96 h.  3.NT:0.5%/1.4%,forearm,15 min | Forehead; chin; cheeks and right forearm | SCH/sebum content/pH with lonto-skin-Diagnose,lonto Comed GmbH | Compared C, lower SCH (p < 0.05), sebum content (p < 0.01) and pH (p < 0.05) in G1 | Patients with sensitive skin possess very dry skin with low fatness, which leads to a disturbance of the protective skin barrier function. They also present a hyperreaction of the skin blood vessels, increased transcutaneous penetration of water-soluble chemicals, enhanced immune responsiveness, significant decrease of alkali resistance and a heightened neurosensory stimulation. |
| **Ham, H.,2016.[58] STROBE C** | | | | | | | | | |
| Cross–sectional | TN=85.  G1:Itch responder  C: non-itch responder. 100% Female | 40.9±8.4 | Korean | None | LAST:1.5 ml,5%,nasolabial fold and cheek, score at each minute for 9 min | nasolabial fold and cheek | CPT:Neurometer CPT/C | Itch responder group showed significantly lower sensory perception values at 5 Hz than the non-itch responder group | The CPT value (5 Hz) can be used for scanning for itching sensations when a cosmetic or its ingredients possibly cause the sensation. |
| **Ma, Y F.,2017.[61] STROBE B** | | | | | | | | | |
| Cross–sectional | TN=166.  G1(SS):n=76;  C(health control):n=38;  G2(SPSS+):n=109;  G3(SPSS-):n=57;  G4(LAST+):n=95;  G4(LAST-):n=71.  100% Female | 18-55(37.8±10.7) | Chinese | √ in 28 related influence factors of sensitive skin | LAST:50 ul,10%,nasolabial folds,2.5 and 5 min | face, the fossa cubitalia | RCM: in vivo imaging Vivascope 1500 | The honeycomb structure depth of sensitive skin group was 20.57± 4.86 lm and healthy control group was 23.27 ±6.38 lm, and significant statistical difference was found between the two groups (P < 0.05), but there was no significant statistical differences between the positive-group and negative-group of the LAST and SPSS groups (P > 0.05). In the positive-group and the negative-group at each group (P < 0.05) of honeycomb pattern and spongiform edema | Based on the RCM results, ‘epidermal honeycomb structure’ and ‘spongiform edema’ may be used as new  skin signs of RCM evaluation of sensitive skin effectively.  Indeed, sensitive skin honeycomb structure depth was thinner  compared with healthy control group. |
| **Yu, L L.,2012.[26] STROBE B** | | | | | | | | | |
| Cross–sectional | TN=93.  G1:n=40,CATP;  C:n=53,CATN.  100% Female. | 20-45 | Chinese | None | CAT:50 ul,1*10-4%,2 min,use 5 gradient methods, whole test duration ranged from 6 to 14 min | nasolabial fold | TEWL:Tewameter;  SCH:Corneometer | 1.G1vs C, in G1,TEWL:↑, SCH:↓. 2.CATbefore vs CATbefore,in G1,TEWL:↑,SCH:↓ (p < 0.05) . 3. Burning ↑.The severity of burning was negatively correlated with the Cap and density of SCH, positively correlated with TEWL | There was a significant correlation between the CAT and several objective measures, including the TEWL, Cap and density of SC |
| **Diogo, L.,2010,[39] STROBE B** | | | | | | | | | |
| Case–control | TN=24.  self-reported,  G1:n=12,SS;  C:n=12,NSS.  100% female | 38.9±13 | Caucasian | None | SLS patch：50 ul,5%, back of each volunteer hand，24 h | Hand | TEWL:TEWAMETER TM 300;  SCH:corneometer CM 825;  a* value:Chroma meters CR 300;  Blood flow:LD flowmeter [PF 5010 PeriFlux (Perimed, Stockholm, Sweden)] | G1 vs C no difference | The results of our study did not enable us to establish a clear discrimination between sensitive and nonsensitive skin, which once again underlines the subjective nature of this condition |
| **Lee, Eunyoung,2009.[59] STROBE C** | | | | | | | | | |
| Cross–sectional | TN=20.  G1:stinger;  C: no-stinger.  60% Female | 25.8±1.4 | NR | None | LAST:5%,1.5 mL,nasolabial fold and cheek,10s and at each minute for 9 min | nasolabial fold and cheek | CPT:electric current generator (Neurometer CPT/C) | The CPT values(250 and 5 Hz) in G1↓ | The change in CPT values can be used for the quantitative evaluation of sensory skin irritation inhibitors. |
| **Pan, Y.,2021.[28] STROBE B** | | | | | | | | | |
| Cross–sectional | TN=209.  1.Questionare:G1:n=104,SS;C1:n=105,NSS.  2.LAST:G2:n=138,LASTP;C2:n=71,LASTN.  100% Female | 18-35(23.3±3.5) | Chinese | √according to the Baumann skin type questionnaire and literature,eight questions ,>15, SS. | LAST:50 ul,10%,nasolabial folds,2.5 and 5 min | forehead, cheek, chin | TEWL:Tewameter TM 300;  SCH:Corneometer CM825;  pH:PH905;  sebum content:SM 815;  skin elasticity:Cutometer MPA580;  EI:MX18 Mexameter;  L*a*b* values:Colorimeter CL400 | 1.G1vs C1:In G1,SCH,sebum content,a* and EI ↑,L*↓. 2.G2 vs C2:In G2,TEWL,a*,EI↑ ,L*↓ | Self-assessed questionnaire is associated with sensitive skin featured by oily and red face without impaired barrier function, whereas LAST is suitable to identify fragile skin barrier and enhanced blood flow on the face. Combination of both methods to diagnose sensitive skin might be more reliable. |
| **An, S.,2007.[29] STROBE B** | | | | | | | | | |
| Cohort | TN=253.  G1:stinger;  C: no-stinger.  100% Female | 20-39(29.23±5.5) | Asian | √ | LAST:5%,1.5 mL,nasolabial fold and cheek, score at 10s and each minute for 9 min | Right cheek | TEWL:VaporMeter SWL-2 (Delfin, Kuopio, Finland);  SCH:CM 820;  Sebum content:Sebumeter SM 815;  pH:PH 900 | 1.G1 vs C: In G1,TEWL ↑(p<0.05),SCH/sebum/pH no difference.2.Winter vs Summer:TEWL↑(p<0.01),pH ↑(p<0.05),SCH↓(p<0.01),sebum content↓(p<0.01) | Our data indicate that there is a relationship between the degree of stinging and the skin barrier function. However, we believe that various additional studies are necessary to characterize skin of stingers and the pathogenesis. |
| **Zha, W F.,2012.[64] STROBE B** | | | | | | | | | |
| Case–control | TN=40.  clinical diagnosis, G1:n=20,SS;  C:n=20,NSS.  100% Female. | G1:20-45(33.6);C:18-38(30.1) | Chinese | clinical diagnosis | None | cheek | CLSM:vivascope l500 connected dermatoscope (iPhone4; Apple) | G1 vs C: In G1,blood vessels distorted like earthworms,the epidermal thickness of simple sensitive skin was thinner(P = 0.001) | Thinned epidermis weakens skin ability to endure various stimulations, which indicates that thickening the skin may play a crucial role in treating skin sensitivity |
| **Ma, Y.,2020.[62] STROBE C** | | | | | | | | | |
| Cross–sectional | TN=100.  G1:n=40,both questionare and LAST positive(SS:34 female,6 male);  C:both questionare and LAST negative (NSS:56 female,4 male).  90% Female. | G1:39.18±8.38; C:39.1±7.95 | Chinese | √ | NR | face and fossa cubitalia | RCM: in vivo imaging Vivascope 1500 | G1 vs C:significant differences were observed between SS subjects and normal controls (P < .05) for honeycomb pattern and spongiform edema | RCM may provide a new method for evaluating the development of rosacea although it failed to distinguish rosacea and SS effectively |
| **Ye, C.,2020.[41] STROBE B** | | | | | | | | | |
| Cohort | TN=24.  SS.100% Female | 19-53(38.63±10.89) | Chinese | √ | LAST:5%,0.4 ml,nasolabial fold, score at 10 s,2.5/5/10 min | forehead, cheeks, and submaxilla | TEWL:Tewameter® TM 300;  SCH:Corneometer® CM 825; sebum content:Sebumeter®SM 810;  pH:pH Meter® PH 900 | 1. TEWL, SCH, sebum content, and pH values on different facial parts were various.2.Two‐way correlation analysis between the results of lactic acid stinging test in different seasons and the sensitivity factors showed differences between summer, autumn, and winter. | Skin sensitivity assessment results were impacted by sea‐ sonal transformation, living habits and customs, and facial regions. These indicted that we should consider above interfering factors when evaluated the skin sensitivity for getting more precise dates. |
| **Sun, L.,2016.[57] STROBE B** | | | | | | | | | |
| Cross–sectional | TN=183.  G1:n=67,both LASTP and CATP(the positive-group); G2:n=32,LASTP;  G3:n=19,CATP;  G4:n=65,LASTN and CATN (the negative-group) .  100% Female | 18-55(33.84±9.77) | Chinese | √ | LAST:10%,0.5 ml,nasolabial fold, score at 30 s,2.5/5 min.  CAT:0.001%,0.05 ml,nasolabial fold, score at 30 s,2.5/5 min | nasolabial fold | Blood flow:Moor Instruments Ltd; CPT:Neurometer CPT/C | 1.Positive-group ↓ than negative-group at both 5 and 250 Hz. 2.Blood flow no difference. | The sensitive subjects were prone to be stimulated by capsaicin to trigger neural and vascular hyper-reactivity. The genetic variation of TRPV1 and the unpleasant sensation demonstrate that TRPV1 play an important role in the pathogenesis of sensitive skin |
| **Agner, T.,1990.[42] STROBE C** | | | | | | | | | |
| Cross–sectional | TN=19.  G1:SLS;  C:nonanoic acid(NON).  NR | 22-34 | NR | None | SLS patch:60 ul,1%,arm,score at 24h/48h;NON patch:60 ul,10%,arm,score at 24h/48h | Right and left arms | TEWL:Servo Med* EPl;  SCH:Skicon 100 high-frequency (3-5-MHz) hydrometer;  Blood flow:laser Doppler flowmeter (Perifiux PP);  Skin thickness: 20-MHz A-mode ultrasound scanner (Dermascan A). | Significant correlations between right- and left-arm patch tests were found for visual scoring and for all noninvasive measurement procedures except electrical conductance | Both SLS and NON were found suitable as test substances |
| **Pierard, G E.,1994.[43] STROBE C** | | | | | | | | | |
| Cohort | TN=15.  SS.  NR | 24-46 | NR | None | SLS patch:0.2 ml,2%,forearm,24h | Forearm | TEWL:EPl evaporimeter  ;a* value:Chromameter CR200;  SCH:Corneometer CM820 | Improved for TEWL, SCH | The study findings suggest that softened fabrics may exert a reduced frictional effect on the skin |
| **Pinto, P.,2011.[17] STROBE C** | | | | | | | | | |
| Cross–sectional | TN=33.  G1:n=15,self-perceived sensitive skin(54±10);  G2:n=18,control group(34±10).  100% Female | 23-64 | NR | None | NR | Hand | TEWL:Tewameter TM 300 | 1.The decay in the curves obtained in volunteers with normal skin is faster than that obtained in the sensitive skin subjects.  2. The area under the curve is smaller in the normal skin group. | Whereas in the studies based in basal TEWL measurements only discrete differences were reported, the dynamic approach followed in this study provided unequivocal evidence of barrier impairment. |
| **Manav, V.2022.[47] STROBE B** | | | | | | | | | |
| Case–control | TN=75.  Questionare: G1:n=35,17 female,18 male, SS;  C:n=40,23 female,17 male, NSS.  53.33% Female. | G1:32.3±11.8;C:37±10.1 | NR | hospital anxiety and depression scale | LAST:10%,nasolabial fold,after 2.5 min,5 min | Forehead, nasolabial folds, nose, chin. | EI: Mexameter 18; sebum content:Sebumeter SM815. | EI:G1↑.Sebum content:G1↑ | Sensitive skin is a disorder that can sometimes occur without any dermatological examination findings. In particular, the sensations of the patients, along with their anxiety levels, are essential parameters that should be evaluated in the approach to patients with sensitive skin. |
| **Boyer, G.,2021.[40] STROBE B** | | | | | | | | | |
| Cross–sectional STROBE A | TN=97.  Children:G1:n=33(15 female,18 male),SS; C:n=44(26 female,18 male),NSS.  Adults:G2:n=10(6 female,4male),SS; C: n=10(6 female,4 male), NSS.  54.64% Female | Children:3- 48 months .Adults:18-20 | Poland | 3 parts | None | Face | SCH:Corneometer CM825 ; TEWL:Aquaflux AF 200 | SCH: In children, SCH was lower in the sensitive skin group; in adults, no significant difference. TEWL: was not different between the sensitive skin and nonsensitive skin groups in either children or adults | Sensitive skin syndrome is associated with impaired skin maturation and desquamation, particularly in infants |
| **Georgieva,2021.[30] STROBE C** | | | | | | | | | |
| Case–control | TN=109.  Questionare: G1:n=64,SS; C:n=45,NSS.  100% Female. | 18-65(43.17±14.45) | NR | 10-item version of the Sensitive Scale | None | left cheek, nuchal area and left palm | SCH:Corneometer CM 825; TEWL:Tewameter® TM 300. | SCH:G1↓,TEWL:G1↑. | All the reported and analyzed results indicate that disorders of the skin barrier are slightly connected with the severity and duration of SS. This could be one of the explanations why adding topical treatment worsen rather than improve SS. |

Supplementary Table 2. Overview of treatment efficacy evaluations on sensitive skin

| **Materials/Products** | **Study design** | **Participants** | **Age** (yrs)  µ±SD or range | **Ethnicity** | **Sensitive skin diagnosis method** | **Monitor** | **Chemical probe** | **Testing site** | **Parameter** | **Outcome** |
| --- | --- | --- | --- | --- | --- | --- | --- | --- | --- | --- |
| **Wang, Y.,2018.[70] STROBE B** | | | | | | | | | | |
| Product | Cohort | TN=20.  G1: antisensitive moisturizing cream;  C: tolerance-extreme cream.  100% Female | 37.1±10.6 | France | LAST | T0 and T28 | LAST:10%, nasolabial fold, score at 10 s,2.5 min and 5 min | Cheekbones | TEWL:Vapometer (Delfin Technologies);  SCH:Corneometer CM825;  Sebum content:Sebumeter SM 815;  skin texture and roughness:Visioscan VC98;  skin color:Minolta 400 Chroma Meter | T0/T28:  1.SCH:48.7±9.5 vs 57.2±10.6 but no statistically significant difference;  2. Statistically significant improvement in clinical grading scores for dryness, roughness, and erythema at 28 days compared to baseline. |
| **Jeong, S.,2016.[71] STROBE B** | | | | | | | | | | |
| Two products comparison | Cohort | TN=60.  G1: Atopalm MLE Cream ;  C: Physiogel Intensive  Cream .  100% Female | 20-40 | Chinese | LAST | 2/4 weeks | LAST:50 ul, 5% ,nasolabial folds, score at 0/2.5/5/8 min | Face | TEWL:TewaMeter TM210; SCH:Corneometer | 1.Atopalm MLE Cream significantly lowered TEWL after 2 and 4 weeks of treatment (p<0.01).2.Both Atopalm MLE Cream and Physiogel Intensive Cream significantly increased SC hydration, and improved LASTS after 4 weeks of treatment. |
| **Hawkins, S S.,2004.[75] STROBE C** | | | | | | | | | | |
| Cleansing, moisturizing, and sunprotection regimens | Cohort | TN=123.  G1:n=28,Normal skin;  G2:n=95,self-perceived sensitive facial skin;  G3:n=25,dermatologistassessed highly sensitive facial skin.  100%Female | 18-48 | NR | Dermatologist-assessed | 2/3/4 weeks | LAST:0.5 mL of de-ionized water and 10% lactic,nasolabial folds, score at 0/2.5/5.0/7.5 min | Face | VISIA | Significant improvements in skin health, as assessed by expert visual assessment, patient self-assessment, and instrumental measures |
| **Berardesca, E.,2020.[73] STROBE C** | | | | | | | | | | |
| Materials:M89 | Cohort | TN=20.  G1:M89;  G2:Standard care.  100% Female | 20-60 | NR | LAST | 0/15/30 d | LAST:50 ul,15%,nasolabial folds,after2.5/5 min | Cheeks | SCH:corneometer CM825 and GPSkin； Barrier;TEWL:tewameter TM 300 and GPSkin Barrier | A significant superiority of M89 over the standard skin care was observed for erythema, skin tightness and dryness (all P≤0.05) as early as Day 15, the skin stinging test was significantly in favour of M89 (P<0.05 at Day 15 and P<0.01 at Day 30) |
| **Nojiri, H.,2018.[84] STROBE B** | | | | | | | | | | |
| Materials:ceramide | Cohort | TN=126.  G1:ceramide complex cream; G2:placebo cream.  100% Female. | NR | Chinese | Self-assessed sensitive facial skin, LAST≥3. | 0/1/2/4 weeks | LAST:50 ul,10%,cheek,0/2/5/8 min | Forehead 、cheek and corner of the mouth | Skin stiffes:Reviscometer;TEWL:Tewameter 300;SCH:SKICON-200EX | TEWL and conductance values were significantly decreased or increased at 1 and 4 weeks |
| **Zhang, Y.,2021.[72] STROBE C** | | | | | | | | | | |
| Two products comparison | Cohort | TN=35.  G1:cream A;  G2:cream B.  100% Female. | 18-55(26.03 ± 6.98 ) | Chinese | LAST scores≥3, SS | 28 d | NR | Cheeks | VISIA;EI:MexameterMX18;TEWL:Tewameter;SCH:Corneometer CM825;a* value,L* :Chromameter CM2500d | 1.Treatments with either cream A or B markedly reduced erythema area, EI, and a* value. Significant reductions in both TEWL and L * value were also observed following topical applications of either cream A or B. 2. Cream A decreased LAST score,the satisfaction rate of cream A was higher than that of cream B |
| **Draelos, Z D.,2020.[78] STROBE C** | | | | | | | | | | |
| Products | Cohort | TN=60.  100% Female | 40-65 | NR | Questionnaire | Baseline, 5–10 minutes post-application, and week 4 | None | Cheek | TEWL:Evaporimeter; SCH:Dermalab | 1.The skin care products were well tolerated and efficacious (P<0.001) in terms of investigator assessed improvement in visual smoothness, tactile smoothness, clarity, radiance, overall appearance, and global anti-aging. 2.Cheek corneometry measurements demonstrated a statistically significant 16% increase in skin moisture content (P<0.001). |
| **Berardesca, E.,2009.[76] STROBE C** | | | | | | | | | | |
| Product | Cohort | TN=40.  G1:active;  G2:placebo.  100% Female | 30-59 | NR | Dermatologist-assessed | 4 weeks | NR | Cheeks | SCH:Corneometer;R1/R2/R6:Cutometer;TEWL:Tewameter;skin roughness:Visioscan; pH:pHmeter;EI: Mexameter | 1.Significant differences were found in the active treated group when compared with the placebo and in particular for instrumental parameters of roughness (P < 0.02), volume (P < 0.01), TEWL (P < 0.02), erythema (P < 0.0006) and clinical parameters of dryness, desquamation and irritation (P < 0.001). 2.Moisturization levels and skin colour improved significantly in both the active and placebo groups. |
| **Bornkessel, A.,2005.[79] STROBE B** | | | | | | | | | | |
| Product | Cohort | TN=30.  63.33% Female | 19-49 | Caucasian | Self-reported | 7/14/21 d | None | Forearms and the right cheek | TEWL:Tewameter TM 300; SCH:corneometer CM 825; pH:Ph900; skin temperature:Digitalthermometer | 1.Significant dehydration was assessed after 21 days vs. baseline without any differences between the watertreated and the washing emulsion-treated forearm.2. On the cheek no dehydration was detectable but the lipid content was reduced under the washing emulsion. 3.The pH value increased in all three test areas after 21 days, again without significant differences between water and the washing solution. |
| **Tan, Y M.,2015.[85] STROBE C** | | | | | | | | | | |
| Materials:Vitamin B3 | Cohort | TN=98.  Age,  G1:n=22,(18-25);  G2:n=15,(26-30);  G3:n=25,(31-35);  G4:n=19,(36-40).  100% Female | 18-40(30.5±6.3) | Chinese | LAST | May to August | LAST:10%,nasolabial fold,30 s,2.5/5/10 min | Nasolabial fold | TEWL:Tewameter TM210; Skin temperature:Thermometer ST 500. | 1.The stimulation sensations felt by VB3 containing cream was significantly higher in May than August.2.Baseline visual scores for erythema scaliness and TEWL in May were also significantly higher than August. 3. |
| **Gueniche, A.,2014.[86] STROBE B** | | | | | | | | | | |
| Materials:ST11 | Cohort | TN=32.  G1:n=32,ST11;G2:n=32,placebo.  100% Female | 18-40 | Caucasian | Questionnaire and CAT | Mid-August 2004 until early June 2005 | CAT:3.18×10-5%、1×10-4% and 3.17×10-4%,nasolabial fold.(On baseline/57 d) | Forearm(TEWL) | TEWL:evaporimeter (Idson) | Compared to the placebo group, TEWL was significantly decreased in the ST11 group when comparing day 1 to day 57 (P=0.0415) |
| **Dieamant, G. C.,2008.[55] STROBE C** | | | | | | | | | | |
| Product | Cohort | TN=124.  G1:n=62,1% of RCAC;  G2:n=62,placebo.100% Female | 40-55 | NR | Stinging test | 1/28/56 d | NR | Forearm | TEWL:Tewameter TM 300. | RCAC prevented water loss, compared with placebo, after 28-day (P < 0.001) and 56-day (P < 0.001) |
| **Isoda, K.,2015.[77] STROBE B** | | | | | | | | | | |
| Product:combined use of a facial cleanser and moisturizers. | Cohort | TN=30.100% Female | 21-39（26.6±6.8） | Japanese | Dermatologist-assessed | 0/1/4 weeks | None | Forehead and cheek | TEWL:Tewameter TM300; sebum content:Sebumeter (Courage + Khazaka electronic); moisture-retention ability (MRA):SKICON-200EX | 1.Transepidermal water loss levels significantly decreased at week 1, however, no significant difference was found at week 4. 2.No significant difference at week 4 compared with week 0 as follows |
| **Nisbet, S J.,2020.[83] STROBE C** | | | | | | | | | | |
| Products | Cohort | TN=30.  G1:n=31,Product A;  G2:n=30,Product B;  G3:n=30,Product C;  G4:n=31,control.  NR. | 18-65 | NR | Self-reported sensitive skin | 30 minutes and 2/12 hours | None | Face and leg | SCH:Corneometer and Skicon 200EX | Products A and B showed higher mean Corneometer readings compared to baseline and changes from baseline were statistically significant when compared to untreated sites. Higher mean readings relative to baseline were seen at sites treated with Control X (smaller magnitude than Product A and B) and with Product C. These changes were significant compared to the untreated site at 30 minutes and 2 hours (Control X), and at 30 minutes and 12 hours (Product C). Additionally, Control Y increased significantly at 12 hours |
| **Neukam, K.,2011.[87] STROBE C** | | | | | | | | | | |
| Products | Cohort | TN=26.  G1:n=13,flaxseed oil (555.32 mg/capsule) ;  G2:n=13,or safflowerseed oil. 100% Female | 18-65 | NR | NT | 0/6/12 weeks | Nicotinate test:5 ul/cm2,0.25%,forearm. | Forearm | a* value:Minolta CR 300; Blood flow:laser Doppler flowmetry (O2C System); Skin surface:visiometer; SCH:CM 825; TEWL:TM 300 | Supplementation with flaxseed oil led to significant decreases in sensitivity (after nicotinate irritation), TEWL, skin roughness and scaling, while smoothness and hydration were increased. |
| **Muizzuddin, N.,1998.[80] STROBE C** | | | | | | | | | | |
| Product | Cohort | TN=49.  G1:n=48,SS;  G2:n=43,NSS | 21-45 | NR | Self-reported | 4/8 weeks | None | Forearm and cheeks | Blood flow:Moor Instruments; TEWL:Servomed Evaporimeter &P-l | Products without emulsifiers improved skin barrier(TEWL) and reactivity |
| **Pierard, G E.,1995.[81] STROBE C** | | | | | | | | | | |
| Product | Cohort | TN=15;6 products.  Both female and male. | 26-43 | NR | Self-assessed | 2 weeks | None | Forearm | TEWL:EPl evaporimeter (Servomed); calorimetric erythemal index (CEI):reflectance calorimeter. | Product C was the mildest and significantly less ir- ritating than products E, A, and B. Products F and D were significantly more irritating |
| **Fatemi, S.,2016.[74] STROBE C** | | | | | | | | | | |
| Materials:strontium chloride (SC), strontium nitrate (SN), potassium nitrate (KN), and zinc chloride (ZC) | Cohort | TN=32.  Experimental group: 1%,3%,5% of SC, SN, KN, and ZC;  control group: no treatment.  .40.63% Female | 28-52 | NR | LAST | 1/4/7 d | LAST; SLS test:60 ul, 1% ,forearm,24 h | Forearm | TEWL:Tewameter; SCH:Corneometer Probe (MPA 9System); skin color:Mexameter Probe (MPA 9 System). | 1.With the exception of ZC, all test substances improved skin hydration but the effect of SC was significant. 2.In respect of colorimetric assessment, all treatments, excluding ZC, reduced erythema significantly compared with an untreated control 7 days after treatment start. |
| **Messaraa, C.,2022.[82] STROBE C** | | | | | | | | | | |
| Products | Cohort | TN=33.  100% Female | 56.3±5.7 | Chinese | Self-assessed | 0/28/56 d | LAST:10%,nasolabial fold, 10 s, 0.5 min ,,, 10 min | Face | SCH:Corneometer CM825; TEWL:Tewameter®TM 300; a* value: spectrophotometer CM-700D; EI:Mexameter®MX 18 | After use, SCH↑,TEWL↓,a* value and EI ↓ |

TN, total numbers; G1, group 1; C, control; NR, not report; SC, stratum corneum; SS, sensitive skin; NSS, non-sensitive skin; TEWL, transdermal water loss; SCH, stratum corneum hydration; L*/ a*, color-opponent dimension based on CIE color space coordinates; EI, erythema index; CPT, current perception threshold; RCM: reflectance confocal microscopy; CLSM, confocal laser scanning microscope; CRM, confocal raman microspectroscopy; D-OCT, dynamic optical coherence tomography; √, has a description.
